# Supplementary material
Source: ML conference proceedings conference paper supplement (https://openreview.net/forum?id=gJRrG43BYC)
Supplement: supplementary_material [file attachment]

## A PROOFS

**Proof of Theorem 2.3** We first prove the existence of a solution  $x \in \mathbb{R}^n$  to the equation  $x = \phi(Ax + b)$  if  $\lambda_{\text{pf}} < 1$ . Since  $\phi$  satisfies Assumption (2.1), we have that for  $t \geq 1$ , the picard iteration

$$x_{t+1} = \phi(Ax_t + b), \quad x_0 = 0, \quad t = 0, 1, \dots$$

satisfies

$$\begin{aligned} |x_{t+1} - x_t| &= |\phi(Ax_t + b) - \phi(Ax_{t-1} + b)| \\ &\leq |A(x_t - x_{t-1})| \leq |A||x_t - x_{t-1}| \\ &\leq |A|^t |x_1 - x_0|. \end{aligned}$$

Hence, for every  $t, \tau \geq 1$ , we have

$$\begin{aligned} |x_{t+\tau} - x_t| &= \left| \sum_{i=t+1}^{t+\tau} (x_i - x_{i-1}) \right| \leq \sum_{k=t}^{t+\tau} |A|^k |x_1 - x_0| \\ &\leq |A|^t \sum_{k=0}^{\tau} |A|^k |x_1 - x_0| \leq |A|^t \sum_{k=0}^{\infty} |A|^k |x_1 - x_0| \\ &= |A|^t (I - |A|)^{-1} |x_1 - x_0|. \end{aligned}$$

The inverse of  $I - |A|$  exists as  $\lambda_{\text{pf}}(|A|) < 1$ . Since  $\lim_{t \rightarrow \infty} |A|^t = 0$ , we have

$$0 \leq \lim_{t \rightarrow \infty} |x_{t+\tau} - x_t| \leq \lim_{t \rightarrow \infty} |A|^t (I - |A|)^{-1} |x_1 - x_0| = 0.$$

We obtain that  $x_t$  is a Cauchy sequence, and thus the sequence converges to some limit point,  $x_\infty$ , which by continuity of  $\phi$  can be obtained by  $x_\infty = \phi(Ax_\infty + b)$ , thus establishes the existence of a solution to  $x = \phi(Ax + b)$ .

For uniqueness, consider two solutions  $x_a, x_b \in \mathbb{R}_+^n$  to the equation, the following inequality holds,

$$0 \leq |x_a - x_b| \leq |A||x_a - x_b| \leq |A|^k |x_a - x_b|.$$

As  $k \rightarrow \infty$ , we have that  $|A|^k \rightarrow 0$ , and it follows that  $x_a = x_b$ , which establishes the unicity of the solution.

**Proof of Theorem 2.4** Consider a neural network  $\mathcal{N}$  in its equivalent implicit form  $(A_{\mathcal{N}}, B_{\mathcal{N}}, C_{\mathcal{N}}, D_{\mathcal{N}}, \phi)$ , since the matrix  $|A_{\mathcal{N}}|$  is strictly upper triangular, all of its eigenvalues are zeros, automatically satisfying the PF sufficient condition for well-posedness. From the Collatz-Wielandt formula (Meyer, 2000), the PF eigenvalue of a well-posed implicit model can be represented as

$$\lambda_{\text{pf}}(|A|) = \inf_{s>0} \left\| \mathbf{diag}(s)|A|\mathbf{diag}(s)^{-1} \right\|_{\infty}.$$

The scaling factor  $s$  such that  $\left\| \mathbf{diag}(s)|A|\mathbf{diag}(s)^{-1} \right\|_{\infty} < 1$  can be obtained by solving

$$s_i = 1 + \sum_{j=i+1}^n |A_{i,j}| s_j, \quad i \in [n],$$

which can then be solved by backward substitution. The new model matrices  $(A', B', C', D', \phi)$ , are obtained by

$$\left( \begin{array}{c|c} A' & B' \\ \hline C' & D' \end{array} \right) = \left( \begin{array}{c|c} SAS^{-1} & SB \\ \hline CS^{-1} & D \end{array} \right)$$

where  $S = \mathbf{diag}(s)$ , with  $s > 0$  a PF eigenvalue of  $|A|$ . More generally, provided that  $\lambda_{\text{pf}}(|A|) < 1$ , we simply set  $s = (I - |A|)^{-1} \mathbf{1}$ , which can be obtained as the limit point of fixed-point iterations.

## B MORE ON PARALLEL TRAINING

**Data structure.** Fitting all the weight matrices into memory requires a substantial amount of storage space. However, we can leverage the high-sparsity property of the problem to reduce the memory consumption when storing the weight matrices. In the high-sparsity regime, schemes known from high-performance computing such as compressed sparse row (CSR) and compressed sparse column (CSC) can store indices of matrices, respectively. Since in this problem, we operate in a row-wise fashion, we choose to store the weight matrices in CSR format. CSR represents the indices in an  $n = n_r \times n_c$  matrix using row and column index arrays. The row array is of length  $n_r$  and store the offsets of each row in the value array in  $\lceil \log_2 m \rceil$  bits, where  $m$  is the number of non-zero elements. The column array is of length  $m$  and stores the column indices of each value in  $\lceil \log_2 n_c \rceil$  bits. The total storage space required is therefore  $n_r \times \lceil \log_2 m \rceil + m \times \lceil \log_2 n_c \rceil$ .

**Multiprocessing.** Given state matrices from a neural network, the basis pursuit problem of (8) and (9) can be paralleled, each involving a single or a block of rows. Each block is trained independently by a child processor with an auxiliary objective, and returns the solutions back to the main processor. We implement our parallel training algorithm with the MULTIPROCESSING package using Python. The MULTIPROCESSING package<sup>5</sup> supports spawning processes and offers both local and remote concurrency. In Python, its Global Interpreter Lock (GIL) only allows one thread to be run at a time under the interpreter, which means we are unable to leverage the benefit of multi-threading. However, with multiprocessing, each process has its own interpreter and the instructions are executed by its own interpreter, which allows multiple processes to be run in parallel, side-stepping the GIL by using sub-processes instead of threads. In MULTIPROCESSING, a process is a program loaded into memory to run and does not share its memory with other processes. The decomposability of the training problem can be viewed as *data parallelism* where the execution of a function, i.e. solving the convex optimization problem, is parallelized, and the input values are distributed across processes. We use the Pool object to offer a means of defining a function in a module so that child processes can each import the module and execute it independently.

**Memory sharing.** In MULTIPROCESSING, data in the arguments are pickled and passed to the child processors by default. In the basis pursuit problem, the state matrix  $X$  and the input data matrix  $U$  remain unchanged during task execution across all the processors, and thus only need read-only access to  $X$  and  $U$ . Passing  $X$  and  $U$  to each processor whenever a new task is scheduled consumes a significant amount of memory space and increases the communication time. As a result, instead of treating them as data input to the function, we put  $X$  and  $U$  into a shared memory, providing direct access of the shared resources across processes.

**Ray.** We also implement our parallel algorithm using RAY<sup>6</sup>, an open-source and general-purpose distributed compute framework for machine learning and deep learning applications. By transforming the execution of the convex training problems into ray **actors**, we are able to distribute the input values to multiple ray actors to run on multiple ray nodes. Similar to the memory sharing in the multiprocessing approach, we use `ray.put()` to save objects into the ray object store, saving memory bandwidth by only passing the object ids around. We run our experiments on the Cori clusters<sup>7</sup> hosted by National Energy Research Scientific Computing (NERSC) Center and use the SLURM-RAY-CLUSTER scripts<sup>8</sup> for running multi-nodes.

**Performance benchmark.** Figure 5 show the run-time for our serial and parallel implementation using both MULTIPROCESSING and RAY. We observe that MULTIPROCESSING

<sup>5</sup><https://docs.python.org/3/library/multiprocessing.html>

<sup>6</sup><https://www.ray.io/>

<sup>7</sup><https://docs.nersc.gov/systems/cori/>

<sup>8</sup><https://github.com/NERSC/slurm-ray-cluster>

provides the best speedup as compared to RAY. We hypothesize that since RAY is a general-purpose distributed compute framework, it contains more overhead than solving the training problem directly using MULTIPROCESSING.

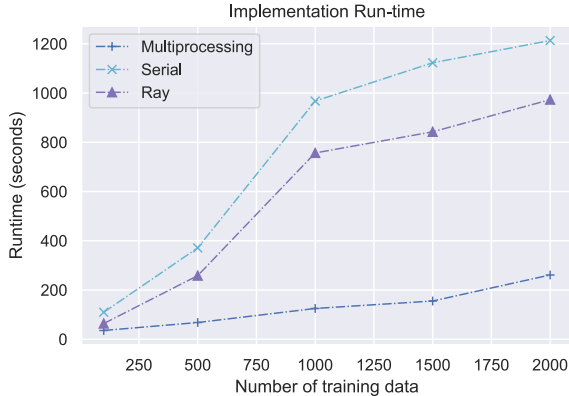

Figure 5: Performance benchmark for serial, multiprocessing (parallel), and Ray (parallel) implementation on FashionMNIST dataset using 8 processors.

## C MORE ON NUMERICAL EXPERIMENTS

Table 2 and Table 3 shows the number of training samples, hyper-parameters, and adversarial test accuracy for perspective relaxation and  $\ell_1$ -norm objective functions with state and outputs matching penalties as in problem (7). For perspective relaxation, we solve the following problem:

$$\min_{M,t,s} \alpha \sum_{ij} s_{ij} + \lambda_1 \|Z - (AX + BU)\|_F^2 \quad (10a)$$

$$+ \lambda_2 \left\| \hat{Y} - (CX + DU) \right\|_F^2 \quad (10b)$$

$$\text{s.t. } (2d), t_{ij} \in [0, 1], M_{ij}^2 \leq s_{ij} \cdot t_{ij}, s_{ij} \geq 0. \quad (10c)$$

For the  $\ell_1$ -norm problem, we solve the following problem:

$$\min_M \beta \sum_{ij} |M_{ij}| + \lambda_1 \|Z - (AX + BU)\|_F^2 \quad (11a)$$

$$+ \lambda_2 \left\| \hat{Y} - (CX + DU) \right\|_F^2 : (2d), \quad (11b)$$

where  $\beta$  controls the degree of regularizing for robustness.

Table 2: Experimental settings for perspective relaxation on Fashion-MNIST.

| # Train Samples | Sparsity (%) | $\lambda_1$ | $\lambda_2$ | $\alpha$ | Test Acc. (%)      |                    |
|-----------------|--------------|-------------|-------------|----------|--------------------|--------------------|
|                 |              |             |             |          | $\epsilon = 0.004$ | $\epsilon = 0.008$ |
| 700             | 15           | 0.1         | 0.1         | 0.01     | 78.7               | 75.4               |
| 500             | 23           | 0.1         | 0.1         | 0.01     | 77.3               | 73.8               |
| 400             | 28           | 0.1         | 0.1         | 0.01     | 76.6               | 72.8               |
| 300             | 36           | 0.1         | 0.1         | 0.01     | 74.9               | 72.4               |
| 200             | 54           | 0.1         | 0.1         | 0.01     | 73.7               | 70.1               |
| 100             | 77           | 0.1         | 0.1         | 0.01     | 57.2               | 49.5               |

Table 3: Experimental settings for  $\ell_1$ -norm on Fashion-MNIST.

| # Train Samples | Sparsity (%) | $\lambda_1$ | $\lambda_2$ | $\beta$ | Test Acc. (%)      |                    |
|-----------------|--------------|-------------|-------------|---------|--------------------|--------------------|
|                 |              |             |             |         | $\epsilon = 0.004$ | $\epsilon = 0.008$ |
| 600             | 20           | 0.1         | 0.1         | 0.001   | 79.6               | 76.2               |
| 1000            | 47           | 0.01        | 0.01        | 0.001   | 79.3               | 76.2               |
| 500             | 26           | 0.01        | 0.01        | 0.01    | 78.3               | 75.0               |
| 2000            | 6            | 0.01        | 0.01        | 0.01    | 77.6               | 74.6               |
| 900             | 65           | 0.01        | 0.01        | 0.001   | 74.9               | 69.9               |
| 400             | 76           | 0.01        | 0.01        | 0.001   | 72.3               | 68.4               |
